# Supplementary material
Source: Springer Nature journal article supplement (https://www.springermedizin.de/resource/supplementary/12245_2011_123_MOESM6_ESM.pdf/9672760)

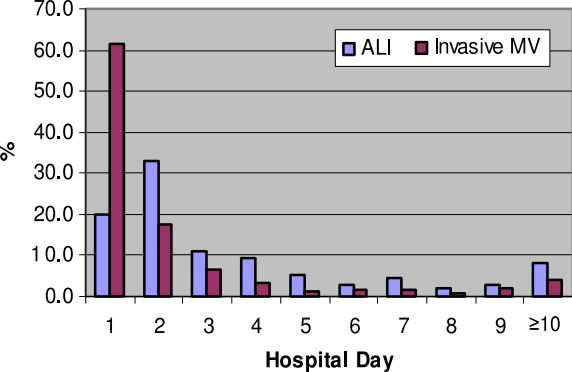

Supplement: MOESM6 [file 9672760]
